# Supplementary material for: miR-203 inhibits ovarian tumor metastasis by targeting BIRC5 and attenuating the TGFβ pathway
Source: J Exp Clin Cancer Res. 2018 Sep 21;37:235. doi: 10.1186/s13046-018-0906-0 (PMC6150978; doi:10.1186/s13046-018-0906-0)
Supplement: Supplementary file 1 — miR-203 enhances the efficacy of YM155 in the inhibion of ovarian cancer cell migration. (DOCX 940 kb) [file 13046_2018_906_MOESM1_ESM.docx]

**miR-203 inhibits ovarian tumor metastasis by targeting BIRC5 and attenuating the TGFβ pathway**

*Baojin Wang1,2,3, Xia Li1,2,3, Guannan Zhao2,3, Huan Yan1,2,3, Peixin Dong6, Hidemichi Watari6, Michelle Sims2,3, Wei Li7, Lawrence M. Pfeffer2,3, *Yuqi Guo4,5, *Junming Yue2,3

Correspondence to Junming Yue, Email: jyue@uthsc.edu


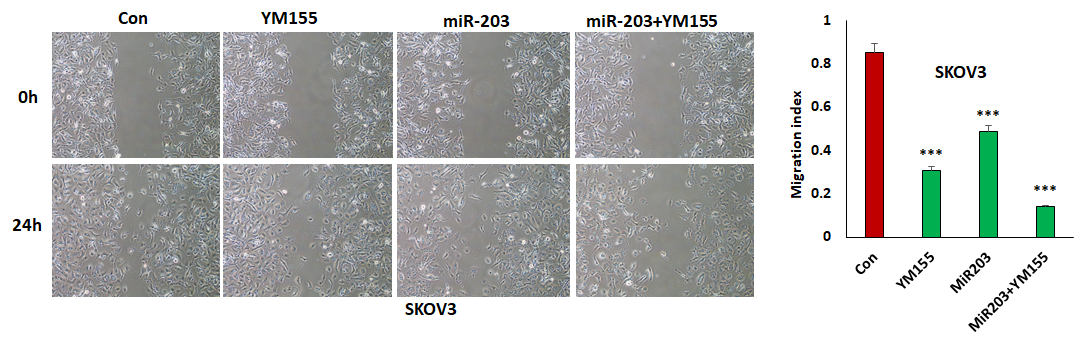
Fig.S1A. miR-203 expression significantly enhanced the efficacy of YM155 in inhibiting SKOV3 cell migration


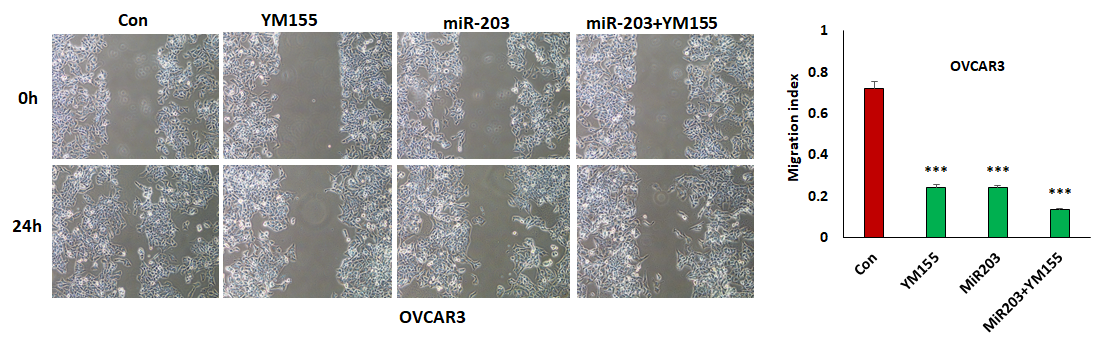
Fig.S1B. miR-203 expression significantly enhanced the efficacy of YM155 in inhibiting OVCAR3 cell migration
